# Supplementary material for: Development of an LNP-Encapsulated mRNA-RBD Vaccine against SARS-CoV-2 and Its Variants
Source: MDPI journal article supplement (doi:10.3390/pharmaceutics14051101), 2022-05-20
Supplement: s1 [file s1]

**Amino acid sequence of RBD**

MDAMKRGLCCVLLLCGAVFVSARVQPTESIVRFPNITNLCPFGEVFNATRFASVYAWN  
RKRISNCVADYSVLYNSASFSTFKCYGVSP TKLNDLCFTNVYADSFVIRGDEV RQIAP  
GQTGKIADYNYKLPDDFTGCVIAWNSNNLDSKVGGNYNYLYRLFRKSNLKP FERDIS  
TEIYQAGSTPCNGVEGFNCYFPLQSYGFQPTNGVG YQPYRVVLSFELLHAPATVCGP  
KKSTNLVKNKCVNF
